# Supplementary material
Source: publisher site journal article supplement (https://www.dovepress.com/article/549854)
Supplement: Supplementary file 1 [file 549854%20Revised%20Supplementary%20Materials.docx]

**Supplementary Information**

**Table S1** Search strategies

| **PUBMED** ( Inception to 25 March 2025), Total: 39 | | |
| --- | --- | --- |
| 1 | Teicoplanin. | 4945 |
| 2 | Targocid. | 4940 |
| 3 | Teichomycin. | 4944 |
| 4 | Teichomycin A2. | 4941 |
| 5 | 1 or 2 or 3 or 4 | 4951 |
| 6 | population pharmacokinetic. | 41784 |
| 7 | pharmacokinetic model. | 157458 |
| 8 | nonlinear mixed effect model. | 6261 |
| 9 | pharmacometrics | 4607 |
| 10 | popPK | 768 |
| 11 | pop PK | 341 |
| 12 | PPK | 1572 |
| 13 | NONMEM. | 3047 |
| 14 | WINNONMIX. | 11 |
| 15 | P-PHARM. | 66 |
| 16 | MWPHARM. | 40 |
| 17 | nlmixed. | 119 |
| 18 | NLME. | 276 |
| 19 | MONOLIX. | 257 |
| 20 | 6 or 7 or 8 or 9 or 10 or 11 or 12 or 13 or 14 or 15 or 16 or 17 or 18 or 19 | 187825 |
| 21 | Children | 3385337 |
| 22 | Child | 3385337 |
| 23 | Neonate* | 121965 |
| 24 | Neonatal | 888636 |
| 25 | Infant* | 1500600 |
| 26 | Newborn | 882061 |
| 27 | Pediatric* | 1297614 |
| 28 | 21 or 22 or 23 or 24 or 25 or 26 or 27 | 4470525 |
| 29 | 5 and 20 and 28 | 39 |

| **EMBASE** (Inception to 25 March 2025), Total: 47 | |  |
| --- | --- | --- |
| 1 | Teicoplanin. | 18513 |
| 2 | Targocid. | 316 |
| 3 | Teichomycin. | 30 |
| 4 | Teichomycin A2. | 3 |
| 5 | 1 or 2 or 3 or 4 | 18516 |
| 6 | population pharmacokinetic. | 24215 |
| 7 | pharmacokinetic model. | 67830 |
| 8 | nonlinear mixed effect model. | 3988 |
| 9 | Pharmacometrics. | 10018 |
| 10 | popPK | 1485 |
| 11 | pop PK | 374 |
| 12 | PPK | 2385 |
| 13 | NONMEM. | 5665 |
| 14 | WINNONMIX. | 16 |
| 15 | P-PHARM. | 99 |
| 16 | MWPHARM. | 96 |
| 17 | nlmixed. | 146 |
| 18 | NLME. | 986 |
| 19 | MONOLIX. | 575 |
| 20 | 6 or 7 or 8 or 9 or 10 or 11 or 12 or 13 or 14 or 15 or 16 or 17 or 18 or 19 | 90518 |
| 21 | Children | 2614830 |
| 22 | Child | 3463546 |
| 23 | Neonate* | 167384 |
| 24 | Neonatal | 426032 |
| 25 | Infant* | 1277299 |
| 26 | Newborn | 864969 |
| 27 | Pediatric* | 2159282 |
| 28 | 21 or 22 or 23 or 24 or 25 or 26 or 27 | 5741956 |
| 29 | 5 and 20 and 28 | 47 |

| **WEB OF SCIENCE** (Inception to 25 March 2025), Total: 62 | |  |
| --- | --- | --- |
| 1 | Teicoplanin. | 10165 |
| 2 | Targocid. | 29 |
| 3 | Teichomycin. | 74 |
| 4 | Teichomycin A2. | 23 |
| 5 | 1 or 2 or 3 or 4 | 10195 |
| 6 | population pharmacokinetic. | 59349 |
| 7 | pharmacokinetic model. | 210084 |
| 8 | nonlinear mixed effect model. | 19370 |
| 9 | pharmacometrics | 1596 |
| 10 | popPK | 917 |
| 11 | pop PK | 191 |
| 12 | PPK | 2757 |
| 13 | NONMEM. | 4532 |
| 14 | WINNONMIX. | 15 |
| 15 | P-PHARM. | 59 |
| 16 | MWPHARM. | 39 |
| 17 | nlmixed. | 248 |
| 18 | NLME. | 597 |
| 19 | MONOLIX. | 327 |
| 20 | 6 or 7 or 8 or 9 or 10 or 11 or 12 or 13 or 14 or 15 or 16 or 17 or 18 or 19 | 261716 |
| 21 | Children | 5096698 |
| 22 | Child | 5096698 |
| 23 | Neonate* | 228183 |
| 24 | Neonatal | 461076 |
| 25 | Infant* | 2029400 |
| 26 | Newborn | 1076323 |
| 27 | Pediatric* | 2379766 |
| 28 | 21 or 22 or 23 or 24 or 25 or 26 or 27 | 7048143 |
| 29 | 5 and 20 and 28 | 62 |

**Notes：**The asterisk (*) following "Neonate", "Infant", and "Pediatric" serves as a truncation symbol in the database search strategy. It represents any number of characters (including zero characters) that may follow the stem of the term, ensuring the retrieval of all relevant variants of the term.

**Table S2** The description of operational criteria for each of the items

| **Items** | **Suggested contents** |
| --- | --- |
| **Title/abstract** |  |
| drug and patient population | The title or abstract identifies the drug(s) and patient population(s) studied; |
| name of the drug(s) studied | The abstract includes the name of the drug(s) studied; |
| route of administration | The abstract includes the route of administration; |
| population studied | The abstract includes population in whom it was studied; |
| primary objective | The abstract includes the results of the primary objective; |
| major findings | The abstract includes the major clinical pharmacokinetic findings; |
| **Background** |  |
| pharmacokinetic data | Pharmacokinetic data (i.e. absorption, distribution, metabolism, excretion) that are known and relevant to the drugs being studied are described; |
| study rationale | An explanation of the study rationale is provided; |
| specific objectives/hypotheses | Specific objectives or hypotheses are provided; |
| **Methods** |  |
| eligibility criteria | Eligibility criteria of study participants are described; |
| co-administration or food | Co-administration (or lack thereof) of study drug(s) with other potentially interacting drugs or food within this study is described |
| Dosing | Drug preparation and administration characteristics, including dose or frequency are described; |
| formulation | Drug preparation and administration characteristics, including formulation or route are described; |
| sampling schedule  bioanalytical methods | Body fluid or tissue sampling (timing, frequency, and storage) for quantitative drug measurement are described  Validation of quantitative bioanalytical methods used in the study are referenced or described if applicable |
| methods for handling missing data | Methods for handling missing data such as drug concentrations below the LLOQ should also be described. |
| modeling software | Pharmacokinetic modeling software used is described |
| statistical methods and software | Statistical methods, including software used, are described |
| candidate structural models | Pharmacokinetic modeling methods used is described, including assumptions made regarding the number of compartments and order of kinetics (zero, first, or mixed order) |
| residual error structure | The assumptions of the distributions of the residual error structure (e.g. additive, proportional, etc.) should be described; |
| methods for base model determination | The structural model determinate should be justified on the grounds of biology, drugmechanism, prior literature, etc. |
| methods for base model evaluation | Standard goodness-of-fit plots were generated to evaluate the base model, such as observed concentrations versus population and individual predictions, histograms of subject-specific random effects, visual predictive checks [VPCs], etc. |
| covariates analysis strategy | Covariates incorporated into pharmacokinetic models are identified and described |
| methods for final model evaluation | Standard goodness-of-fit plots were generated to evaluate the base model, such as observed concentrations versus population and individual predictions, histograms of subject-specific random effects, visual predictive checks [VPCs], etc. |
| distribution of individual model parameters | The assumptions of the distributions of individual model parameters (e.g. lognormal) should be described; |
| estimation method(s) used | Pharmacokinetic modeling estimation method used is described, such as FOCE-I. |
| **Results** |  |
| population characteristic | A table of summary clinical variables of subjects; |
| No. of subjects and observations | A table of summary statistics of subject demographics; |
| schematic of the final model | A schematic of the final structural model to characterize the drug absorption, distribution and elimination |
| table of the final model parameters | All final model parameter estimates should be listed in a table. |
| final model evaluation plots | Including observed concentrations versus population and individual predictions, histograms of subject-specific random effects, visual predictive checks [VPCs], etc. |
| summary of the model-building process and the derived final model | Including the results from the best base model, univariate covariate analysis, covariate selection (pivotal steps) and the final model |
| plot of concentrations vs. time and/or effects vs. concentrations | A plot of drug concentrations versus time in all subjects is displayed to understand choices for candidate structural models; |
| **Discussion/conclusion** |  |
| study limitations | Study limitations describing potential sources of bias and imprecision, where relevant, should be described; |
| study findings | The relevance of study findings (applicability, external validity) is described; |

**Table S3**  Characteristics of virtual patients and dosing regimens

| **Group** | **Weight (kg)** | **Age (years)** | **Dosing Regimen** |
| --- | --- | --- | --- |
| Preterm infants | 1.5 | 10 d | Loading: 10 mg/kg q12h for three doses  Maintenance: 10 mg/kg q24h |
| Neonates | 3.5 | 10 d | Loading: 10 mg/kg q12h for three doses  Maintenance: 10 mg/kg q24h |
| Infants | 7 | 0.5 | Loading: 10 mg/kg q12h for three doses  Maintenance: 10 mg/kg q24h |
| Children | 21 | 6 | Loading: 10 mg/kg q12h for three doses  Maintenance: 10 mg/kg q24h |
| Adolescents | 60 | 14 | Loading: 10 mg/kg q12h for three doses  Maintenance: 10 mg/kg q24h |
